# Supplementary material for: Genome-wide analysis of a collective grave from Mentesh Tepe provides insight into the population structure of early neolithic population in the South Caucasus
Source: PubMed Central journal article supplement (PMC10039893; doi:10.1038/s42003-023-04681-w), 2023-03-25
Supplement: 42003_2023_4681_MOESM3_ESM.pdf [file 42003_2023_4681_MOESM3_ESM.pdf]

## Description of Additional Supplementary Files

**File name:** Supplementary Data 1

**Description:** List of the samples from the Early Neolithic structure S342, indicating their archaeological ID, C14 dates, their genetic sex, their mitochondrial and Y chromosome haplogroups and the quality of the genetic data. The informations not provided by this article come from 23,25..

**File name:** Supplementary Data 2

**Description:** Published ancient genome-wide data (modified .anno file from Allen Ancient DNA Resource (AADR); Skourtanioti et al. 2020)

**File name:** Supplementary Data 3

**Description:** All D-statistics used in this study, including the data behind Figure 2.c and Supplementary Figure 3 and 6

**File name:** Supplementary Data 4

**Description:** All qpAdm models calculated for this study, including the data behind Figure 2.d and Supplementary Figure 4 and 7.

**File name:** Supplementary Data 5

**Description:** Data from the READ analysis
