# Supplementary material for: Genome-wide analysis of a collective grave from Mentesh Tepe provides insight into the population structure of early neolithic population in the South Caucasus
Source: PubMed Central journal article supplement (PMC10039893; doi:10.1038/s42003-023-04681-w), 2023-03-25
Supplement: 42003_2023_4681_MOESM9_ESM.pdf [file 42003_2023_4681_MOESM9_ESM.pdf]

## Reporting Summary

Nature Portfolio wishes to improve the reproducibility of the work that we publish. This form provides structure for consistency and transparency in reporting. For further information on Nature Portfolio policies, see our [Editorial Policies](#) and the [Editorial Policy Checklist](#).

### Statistics

For all statistical analyses, confirm that the following items are present in the figure legend, table legend, main text, or Methods section.

n/a | Confirmed

- The exact sample size ( $n$ ) for each experimental group/condition, given as a discrete number and unit of measurement
- A statement on whether measurements were taken from distinct samples or whether the same sample was measured repeatedly
- The statistical test(s) used AND whether they are one- or two-sided  
*Only common tests should be described solely by name; describe more complex techniques in the Methods section.*
- A description of all covariates tested
- A description of any assumptions or corrections, such as tests of normality and adjustment for multiple comparisons
- A full description of the statistical parameters including central tendency (e.g. means) or other basic estimates (e.g. regression coefficient) AND variation (e.g. standard deviation) or associated estimates of uncertainty (e.g. confidence intervals)
- For null hypothesis testing, the test statistic (e.g.  $F$ ,  $t$ ,  $r$ ) with confidence intervals, effect sizes, degrees of freedom and  $P$  value noted  
*Give  $P$  values as exact values whenever suitable.*
- For Bayesian analysis, information on the choice of priors and Markov chain Monte Carlo settings
- For hierarchical and complex designs, identification of the appropriate level for tests and full reporting of outcomes
- Estimates of effect sizes (e.g. Cohen's  $d$ , Pearson's  $r$ ), indicating how they were calculated

*Our web collection on [statistics for biologists](#) contains articles on many of the points above.*

### Software and code

Policy information about [availability of computer code](#)

Data collection | no software was used for data collection

Data analysis | All software packages used for data analysis are cited in the Material and Methods section and are publicly available. EAGER-v1.92.37, AdapterRemoval-v2.2.1a, BWA-v0.7.17-r1188, samtools v1.6.0, DeDup v0.12.1, MapDamage v2.0.6, SequenceTools PileupCaller-v1.5.0, AuthentiCT, ANGSD v 0.921, EIGENSOFT package, PLINK v1.9, ADMIXTURE v1.3.0, ADMIXTOOLS, DATES v75318, Haplogrep v2.25, READ, TKGWV2

For manuscripts utilizing custom algorithms or software that are central to the research but not yet described in published literature, software must be made available to editors and reviewers. We strongly encourage code deposition in a community repository (e.g. GitHub). See the Nature Portfolio [guidelines for submitting code & software](#) for further information.

## Data

Policy information about [availability of data](#)

All manuscripts must include a [data availability statement](#). This statement should provide the following information, where applicable:

- Accession codes, unique identifiers, or web links for publicly available datasets
- A description of any restrictions on data availability
- For clinical datasets or third party data, please ensure that the statement adheres to our [policy](#)

The data generated for this study (bam file) can be found in the European Nucleotide Archive under accession number ERP139757 and will be released at the publication of the paper.

## Human research participants

Policy information about [studies involving human research participants and Sex and Gender in Research](#).

|                             |                                                                                          |
|-----------------------------|------------------------------------------------------------------------------------------|
| Reporting on sex and gender | <input type="text" value="We only report the genetic sex of archeological individuals"/> |
| Population characteristics  | <input type="text" value="n/a"/>                                                         |
| Recruitment                 | <input type="text" value="n/a"/>                                                         |
| Ethics oversight            | <input type="text" value="n/a"/>                                                         |

Note that full information on the approval of the study protocol must also be provided in the manuscript.

## Field-specific reporting

Please select the one below that is the best fit for your research. If you are not sure, read the appropriate sections before making your selection.

- Life sciences       Behavioural & social sciences       Ecological, evolutionary & environmental sciences

For a reference copy of the document with all sections, see [nature.com/documents/nr-reporting-summary-flat.pdf](https://www.nature.com/documents/nr-reporting-summary-flat.pdf)

## Life sciences study design

All studies must disclose on these points even when the disclosure is negative.

|                 |                                                                                                  |
|-----------------|--------------------------------------------------------------------------------------------------|
| Sample size     | <input type="text" value="3"/>                                                                   |
| Data exclusions | <input type="text" value="related individuals were excluded from population genetics analysis"/> |
| Replication     | <input type="text" value="All steps have been detailed in the Materials and Methods section"/>   |
| Randomization   | <input type="text" value="n/a"/>                                                                 |
| Blinding        | <input type="text" value="n/a"/>                                                                 |

## Reporting for specific materials, systems and methods

We require information from authors about some types of materials, experimental systems and methods used in many studies. Here, indicate whether each material, system or method listed is relevant to your study. If you are not sure if a list item applies to your research, read the appropriate section before selecting a response.

## Materials &amp; experimental systems

## Methods

- n/a Involved in the study
- Antibodies
- Eukaryotic cell lines
- Palaeontology and archaeology
- Animals and other organisms
- Clinical data
- Dual use research of concern

- n/a Involved in the study
- ChIP-seq
- Flow cytometry
- MRI-based neuroimaging

## Palaeontology and Archaeology

- Specimen provenance   
The three human samples origin and excavation is detailed in the article.
- Specimen deposition
- Dating methods
- Tick this box to confirm that the raw and calibrated dates are available in the paper or in Supplementary Information.
- Ethics oversight

Note that full information on the approval of the study protocol must also be provided in the manuscript.
